# Supplementary material for: A single seizure selectively impairs hippocampal‐dependent memory and is associated with alterations in PI3K/Akt/mTOR and FMRP signaling
Source: PubMed Central journal article supplement — Epilepsia Open. 2018 Oct 28;3(4):511–23. doi: 10.1002/epi4.12273 (PMC6276778; doi:10.1002/epi4.12273), 2018-10-28
Supplement: EPI4-3-511-s001.pdf [file EPI4-3-511-s001.pdf]

Supplementary Table 1  
*Antibodies Used for Western Blotting*

| <u>Antibody</u> | <u>Sample Type</u> | <u>Conc.</u> | <u>Supplier</u>           | <u>Loading Control</u> | <u>Pairing</u> | <u>Secondary</u> |
|-----------------|--------------------|--------------|---------------------------|------------------------|----------------|------------------|
| AKT             | Homogenate         | 1:500        | Cell Signaling Technology | Actin                  | Together       | Rabbit           |
| pAKT (s473)     | Homogenate         | 1:500        | Cell Signaling Technology | Actin                  | Together       | Rabbit/mouse     |
| S6 (s235/236)   | Homogenate         | 1:500        | Cell Signaling Technology | Actin                  | Together       | Rabbit           |
| pS6 (s235/236)  | Homogenate         | 1:500        | Cell Signaling Technology | Actin                  | Separate       | Rabbit           |
| pS6 (s240/244)  | Homogenate         | 1:500        | Cell Signaling Technology | Actin                  | Separate       | Rabbit           |
| p70S6K          | Homogenate         | 1:500        | Cell Signaling Technology | Actin                  | Separate       | Rabbit/mouse     |
| FMRP            | Synaptosome        | 1:500        | Cell Signaling Technology | Actin                  | Separate       | Rabbit/mouse     |
| pFMRP (s499)    | Synaptosome        | 1:500        | PhosphoSolutions          | Actin                  | Separate       | Rabbit           |
| GFAP            | Synaptosome        | 1:500        | Cell Signaling Technology | Actin                  | Together       | Rabbit/mouse     |
| GluA1           | Synaptosome        | 1:500        | NeuroMab                  | Actin                  | Together       | Rabbit/mouse     |
| mGluR 1/5       | Synaptosome        | 1:500        | NeuroMab                  | Actin                  | Together       | Rabbit/mouse     |
| NR2A            | Synaptosome        | 1:500        | Merck Millipore           | Actin                  | Together       | Rabbit           |
| NR2B            | Synaptosome        | 1:500        | Merck Millipore           | Actin                  | Together       | Rabbit           |
| Pan-Shank       | Synaptosome        | 1:500        | NeuroMab                  | Actin                  | Together       | Rabbit/mouse     |
| PSD-95          | Synaptosome        | 1:500        | NeuroMab                  | Actin                  | Together       | Rabbit/mouse     |
| Actin           |                    | 1:1000       | Cell Signaling Technology |                        |                |                  |

Note: Secondary antibodies were 1:20,000 anti-rabbit, anti-mouse, or both.

Supplementary Table 2

## Western Blotting Summary - Hippocampus

| Protein                | 1 hour         |                 |        |        | 24 hour        |                 |        |        | 1 week         |                 |        |      |
|------------------------|----------------|-----------------|--------|--------|----------------|-----------------|--------|--------|----------------|-----------------|--------|------|
|                        | Control        | Seizure         | Change | Sig.   | Control        | Seizure         | Change | Sig.   | Control        | Seizure         | Change | Sig. |
| AKT                    | 100 ± 1.6,     | 112 ± 5.32,     | -      | -      | 100 ± 9.02,    | 108.85 ± 12.56, | -      | -      | 100 ± 1.6,     | 112 ± 5.32,     | -      | -    |
| pAKT (s473)            | 100 ± 7.18,    | 108 ± 9.98,     | -      | -      | 100 ± 10.19,   | 98.5 ± 16.96,   | -      | -      | 100 ± 7.18,    | 108 ± 9.98,     | -      | -    |
| % Total pAkt (s473)    | 99.95 ± 7.03,  | 93.33 ± 9.78,   | -      | -      | 101.34 ± 7.54, | 88.94 ± 8.14,   | -      | -      | 99.95 ± 7.03,  | 93.33 ± 9.78,   | -      | -    |
| S6                     | 100 ± 1.95,    | 102.15 ± 1.88,  | -      | -      | 100 ± 6.35,    | 99.74 ± 7.86,   | -      | -      | 100 ± 1.95,    | 102.15 ± 1.88,  | -      | -    |
| pS6 (s235/236)         | 100 ± 7.16,    | 162.5 ± 6.66,   | ↑      | ***    | 100 ± 4.13,    | 105.87 ± 9.04,  | -      | -      | 100 ± 7.16,    | 162.5 ± 6.66,   | -      | -    |
| % Total pS6 (s235/236) | 101.29 ± 8.51, | 154.15 ± 7.41,  | ↑      | ***    | 100.33 ± 4.98, | 107.87 ± 10.18, | -      | -      | 101.29 ± 8.51, | 154.15 ± 7.41,  | -      | -    |
| pS6 (s240/244)         | 100 ± 1.66,    | 110.8 ± 1.6,    | ↑      | ***    | 100 ± 6.52,    | 101.18 ± 7.18,  | -      | -      | 100 ± 1.66,    | 110.8 ± 1.6,    | -      | -    |
| % Total pS6 (s240/244) | 100.1 ± 1.14,  | 108.603 ± 1.52, | ↑      | ***    | 99.98 ± 1.28,  | 101.85 ± 1.7,   | -      | -      | 100.1 ± 1.14,  | 108.603 ± 1.52, | -      | -    |
| p70S6K                 | 100 ± 14.95,   | 112 ± 13.44,    | -      | -      | 100 ± 6.84,    | 99.97 ± 11.21,  | -      | -      | 100 ± 14.95,   | 112 ± 13.44,    | -      | -    |
| FMRP                   | 100 ± 10.72,   | 145.13 ± 16.86, | ↑      | *      | 100 ± 7.73,    | 97.3 ± 10.86,   | -      | -      | 100 ± 10.72,   | 145.13 ± 16.86, | -      | -    |
| pFMRP (s499)           | 100 ± 10.83,   | 126.78 ± 8.86,  | ↑      | # .074 | 100 ± 6.08,    | 111.11 ± 10.05, | -      | -      | 100 ± 10.83,   | 126.78 ± 8.86,  | -      | -    |
| % Total FMRP (s499)    | 102.4 ± 6.28,  | 106.92 ± 27.9,  | ↑      | # .077 | 102.23 ± 6.29, | 120.52 ± 12.94, | -      | -      | 102.4 ± 6.28,  | 106.92 ± 27.9,  | -      | -    |
| GFAP                   | 100 ± 1.88,    | 100.69 ± 1.26,  | -      | -      | 100 ± 1.12,    | 106.7 ± 5.55,   | -      | -      | 100 ± 1.88,    | 100.69 ± 1.26,  | -      | -    |
| GluA1                  | -              | -               | -      | -      | 100 ± 4.48,    | 119.76 ± 6.66,  | ↑      | *      | -              | -               | -      | -    |
| mGluR 1/5              | 100 ± 10.82,   | 92.95 ± 17.01,  | -      | -      | 100 ± 8.03,    | 127.13 ± 35.34, | -      | -      | 100 ± 10.82,   | 92.95 ± 17.01,  | -      | -    |
| NR2A                   | 100 ± 3.31,    | 95.2 ± 2.94,    | -      | -      | 100 ± 3.49,    | 97.18 ± 2.58,   | -      | -      | 100 ± 3.31,    | 95.2 ± 2.94,    | -      | -    |
| NR2B                   | 100 ± 11.54,   | 84.08 ± 3.65,   | -      | -      | 100 ± 2.13,    | 98.13 ± 3.83,   | -      | -      | 100 ± 11.54,   | 84.08 ± 3.65,   | -      | -    |
| Pan-Shank              | 100 ± 4.002,   | 106.09 ± 2.39,  | -      | -      | 100 ± 6.004,   | 119.15 ± 10.52, | -      | -      | 100 ± 4.002,   | 106.09 ± 2.39,  | -      | -    |
| PSD-95                 | 100 ± 6.37,    | 95.56 ± 8.96,   | -      | -      | 100 ± 2.77,    | 135.03 ± 13.94, | ↑      | # .065 | 100 ± 6.37,    | 95.56 ± 8.96,   | -      | -    |

Note: Values are the mean ± SEM. ↑ = increase, # = trending, \* p < 0.05, \*\*\* p < 0.001.

Supplementary Table 3

## Western Blotting Summary - Cortex

| Protein                | 1 hour           |                 |        |        | 24 hour        |                 |        |        | 1 week          |                 |        |      |
|------------------------|------------------|-----------------|--------|--------|----------------|-----------------|--------|--------|-----------------|-----------------|--------|------|
|                        | Control          | Seizure         | Change | Sig.   | Control        | Seizure         | Change | Sig.   | Control         | Seizure         | Change | Sig. |
| AKT                    | 100 ± 4.32,      | 97.11 ± 3.59,   | -      | -      | 100 ± 2.84,    | 98.25 ± 1.56,   | -      | -      | 100 ± 4.63,     | 92.62 ± 3.57,   | -      | -    |
| pAkt (s473)            | 100 ± 10.25,     | 107.57 ± 7.96,  | -      | -      | 100 ± 9.09,    | 111.36 ± 29.69, | -      | -      | 100 ± 15.18,    | 81.76 ± 13.77,  | -      | -    |
| % Total pAkt (s473)    | 103.35 ± 13.88,  | 110.93 ± 7.42,  | -      | -      | 100.76 ± 9.85, | 112.94 ± 29.83, | -      | -      | 99.75 ± 14.24,  | 88.98 ± 15.31,  | -      | -    |
| S6                     | 100 ± 22.54,     | 84.6 ± 13.45,   | -      | -      | 100 ± 11.04,   | 89.44 ± 10.31,  | -      | -      | 100 ± 8.85,     | 107.55 ± 24.4,  | -      | -    |
| pS6 (s235/236)         | 100 ± 20.57,     | 77.06 ± 14.27,  | -      | -      | 100 ± 7.69,    | 111.29 ± 17.28, | -      | -      | 100 ± 10.36,    | 88.61 ± 6.91,   | -      | -    |
| % Total pS6 (s235/236) | 385.39 ± 276.65, | 131.11 ± 39.33, | -      | -      | 107.58 ± 12.3, | 96.54 ± 15.45,  | -      | -      | 103.13 ± 13.55, | 102.47 ± 9.76,  | -      | -    |
| pS6 (s240/244)         | 100 ± 24.07,     | 97.37 ± 20.31,  | -      | -      | 100 ± 8.85,    | 85.68 ± 9.03,   | -      | -      | 100 ± 5.92,     | 97.49 ± 13.32,  | -      | -    |
| % Total pS6 (s240/244) | 330.21 ± 226.69, | 144.93 ± 33.32, | -      | -      | 102.91 ± 5.6,  | 100.91 ± 12.52, | -      | -      | 102.68 ± 5.63,  | 125.07 ± 25.47, | -      | -    |
| p70S6K                 | 100 ± 4.12,      | 85.48 ± 8.64,   | -      | -      | 100 ± 18.04,   | 74.67 ± 19.88,  | -      | -      | 100 ± 7.54,     | 166.35 ± 22.76, | ↑      | *    |
| FMRP                   | 100 ± 13.86,     | 118.58 ± 18.38, | -      | -      | 100 ± 3.81,    | 156.97 ± 28.51, | ↑      | # .068 | 100 ± 13.07,    | 108.02 ± 14.68, | -      | -    |
| pFMRP (s499)           | 100 ± 4.9,       | 108.07 ± 10.79, | -      | -      | 100 ± 10.11,   | 119.03 ± 16.08, | -      | -      | 100 ± 8.92,     | 110.97 ± 9.24,  | -      | -    |
| % Total FMRP (s499)    | 108.77 ± 8.74,   | 102.13 ± 12.81, | -      | -      | 98.51 ± 7.04,  | 88.56 ± 12.76,  | -      | -      | 130.66 ± 39.31, | 108.65 ± 6.98,  | -      | -    |
| GFAP                   | 100 ± 2.97,      | 93.44 ± 6.27,   | ↓      | # .063 | 100 ± 4.96,    | 104.45 ± 9.31,  | -      | -      | 100 ± 7.25,     | 93.63 ± 4.5,    | -      | -    |
| GluA1                  | -                | -               | -      | -      | 100 ± 2.21,    | 96.89 ± 8.38,   | -      | -      | 100 ± 7.34,     | 116.73 ± 20.98, | -      | -    |
| mGluR 1/5              | 100 ± 10.75,     | 100.84 ± 13.16, | -      | -      | 100 ± 3.71,    | 119.87 ± 14.24, | -      | -      | 100 ± 4.96,     | 99.22 ± 8.69,   | -      | -    |
| NR2A                   | 100 ± 10.15,     | 96.09 ± 19.66,  | -      | -      | 100 ± 13.36,   | 109.21 ± 18.04, | -      | -      | 100 ± 10.96,    | 89.31 ± 9.24,   | -      | -    |
| NR2B                   | 100 ± 14.77,     | 140.02 ± 35.55, | -      | -      | 100 ± 18.78,   | 128.37 ± 20.16, | -      | -      | 100 ± 4.21,     | 77.38 ± 7.31,   | -      | -    |
| Pan-Shank              | 100 ± 5.08,      | 101.36 ± 7.16,  | -      | -      | 100 ± 8.69,    | 108.9 ± 15.44,  | -      | -      | 100 ± 8.12,     | 88.34 ± 5.92,   | -      | -    |
| PSD-95                 | 100 ± 7.17,      | 83.07 ± 3.84,   | ↓      | # .054 | 100 ± 9.37,    | 119.02 ± 11.03, | -      | -      | 100 ± 6.08,     | 95.37 ± 7.92,   | -      | -    |

Note: Values are the mean ± SEM. ↑ = increase, ↓ = decrease, # = trending, \* p < 0.05.
